# Supplementary material for: Effect of hydrogen diffusion in an In–Ga–Zn–O thin film transistor with an aluminum oxide gate insulator on its electrical properties
Source: PubMed Central journal article supplement (PMC9078200; doi:10.1039/c7ra12841j), 2018-02-01
Supplement: RA-008-C7RA12841J-s001.pdf [file RA-008-C7RA12841J-s001.pdf]

(Supplementary Information)

## **Effect of Hydrogen Diffusion in an In-Ga-Zn-O Thin Film Transistor with an Aluminum Oxide Gate Insulator on Its Electrical Properties**

Yunyong Nam,<sup>a</sup> Hee-Ok Kim,<sup>b</sup> Sung Haeng Cho,<sup>b</sup> and Sang-Hee Ko Park<sup>\*a</sup>

<sup>a</sup> Smart & Soft Materials & Devices Laboratory (SSMD), Department of Materials Science and Engineering, Korea Advanced Institute of Science and Technology (KAIST), 291 Daehak-ro, Yuseong-gu, Daejeon 34141, Korea

<sup>b</sup> ICT Materials & Components Research Laboratory, Electronics and Telecommunications Research Institute (ETRI), 218 Gajeong-ro, Yuseong-gu, Daejeon, 34129, Korea

\*Corresponding author: Email address: shkp@kaist.ac.kr

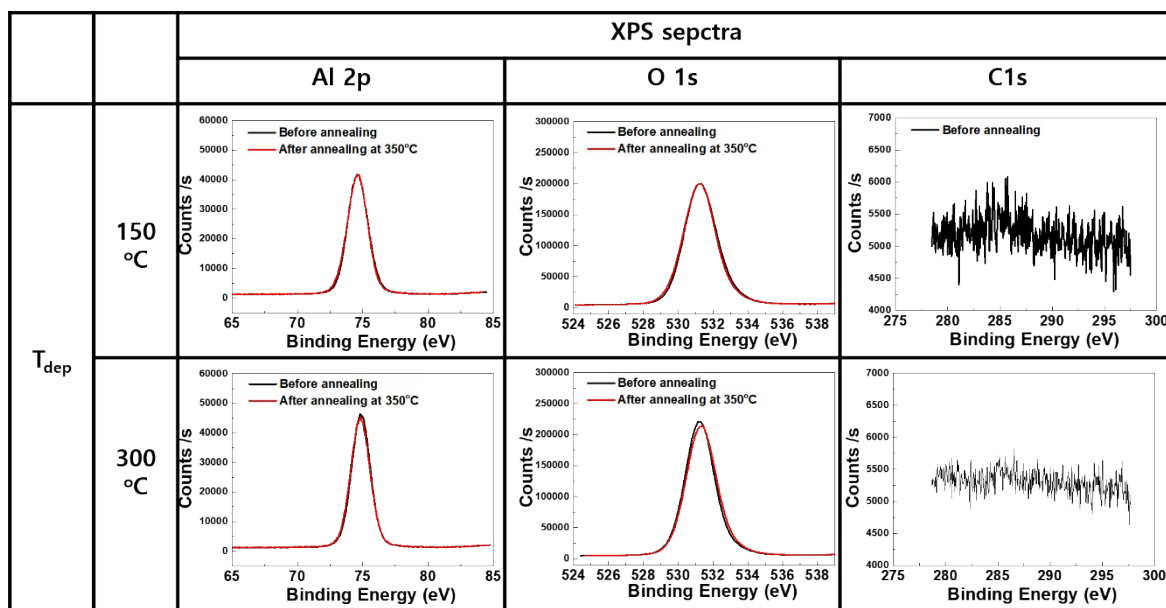

| Chemical composition (at%) |       |       |
|----------------------------|-------|-------|
| Depo. Temp.                | Al    | O     |
| 150                        | 42.83 | 57.17 |
| 300                        | 43.1  | 56.9  |

**Fig.S1.** XPS spectra (Al 2p, O 1s, and C 1s peaks) of the ALD- $\text{Al}_2\text{O}_3$  gate insulators according to deposition temperature before and after post-annealing at 350 °C in a vacuum for 2 hr. The spectra were calibrated with Ar 2p peak (241.9 eV) after Ar sputtering. The chemical compositions were summarized in the table.

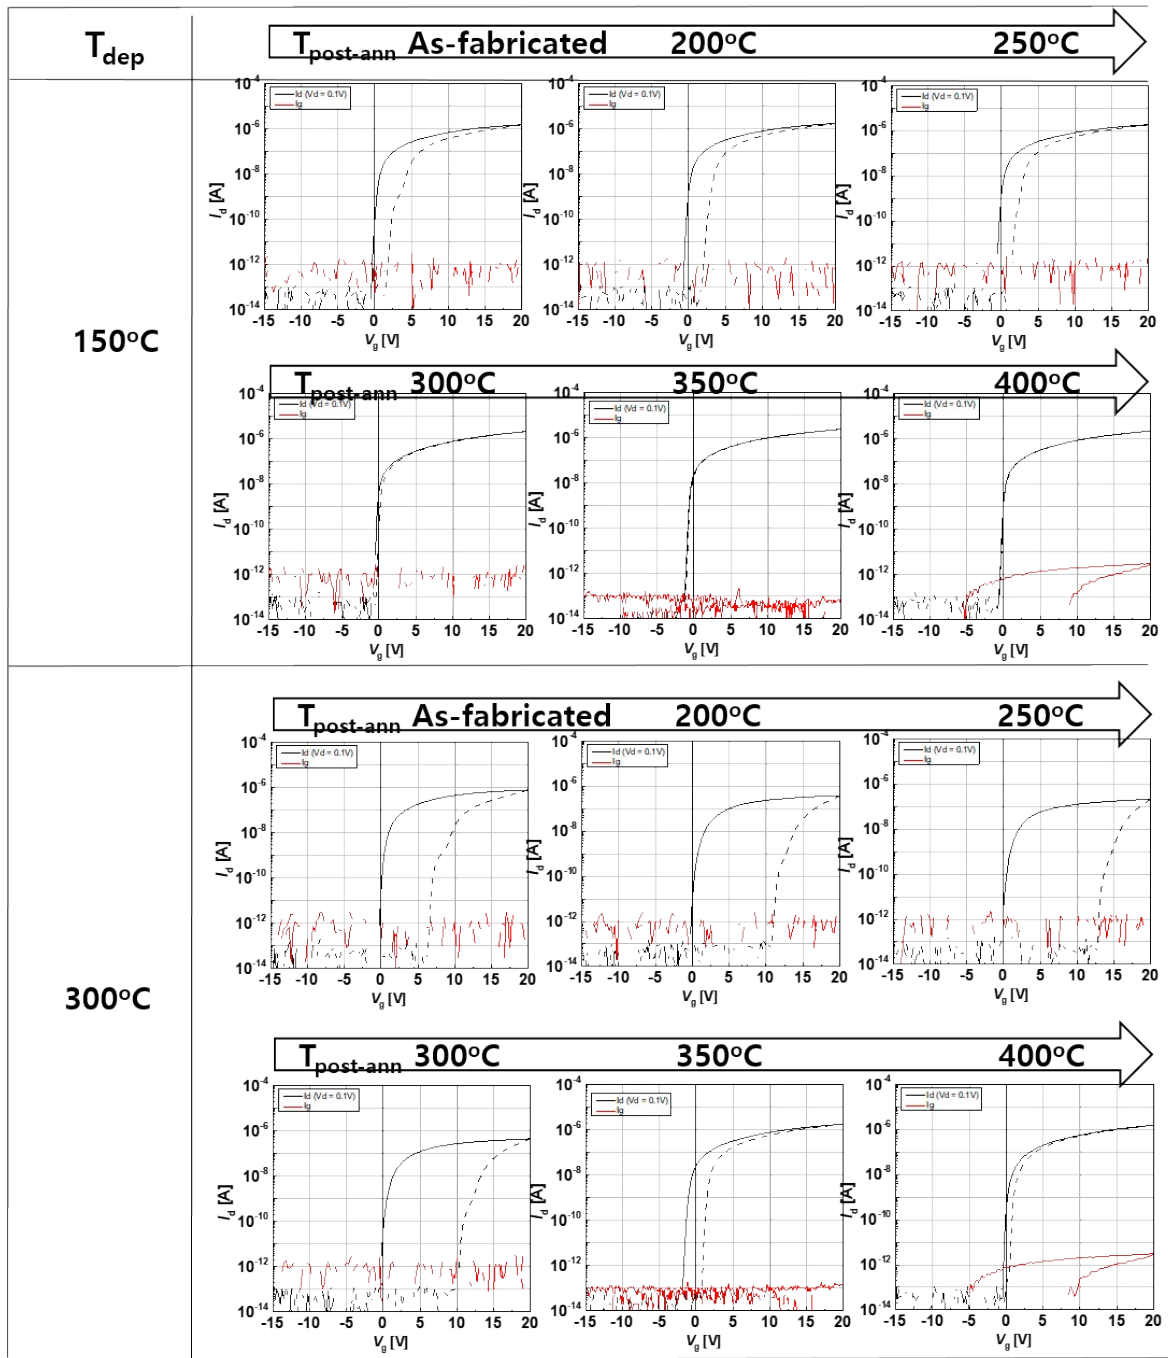

**Fig.S2.** Individual transfer curves of the a-IGZO TFTs with the Al<sub>2</sub>O<sub>3</sub> gate insulators of  $T_{\text{dep}} = 150^\circ\text{C}$  and  $300^\circ\text{C}$  according to the post-annealing temperatures ( $T_{\text{post-ann}} = 200\text{--}400^\circ\text{C}$ )

| $T_{dep}$ | Annealing Temp. | S.S  | Von   | Hys.  | $u_{lin}$ | $u_{sat}$ |
|-----------|-----------------|------|-------|-------|-----------|-----------|
| 150°C     | As              | 0.19 | -0.25 | 2.25  | 12.97     | 10.3      |
|           | 200°C Vac.      | 0.18 | -0.5  | 2.75  | 11.9      | 10.9      |
|           | 250°C Vac.      | 0.18 | -0.5  | 2     | 12.1      | 11.76     |
|           | 300°C Vac.      | 0.12 | -0.75 | 0     | 17.8      | 11.6      |
|           | 350°C Vac.      | 0.13 | -1    | 0.14  | 18.7      | 12        |
|           | 400°C Vac.      | 0.12 | -0.5  | 0     | 18.5      | 12.1      |
| 300°C     | As              | 0.18 | -0.25 | 8     | 3.95      | 7.3       |
|           | 200°C Vac.      | 0.27 | 0     | 11.25 | 2.41      | 4.37      |
|           | 250°C Vac.      | 0.3  | 1.25  | 11.25 | 1.5       | 3.78      |
|           | 300°C Vac.      | 0.22 | -1    | 10.5  | 2.1       | 4.2       |
|           | 350°C Vac.      | 0.16 | -1.56 | 2.52  | 14        | 10.1      |
|           | 400°C Vac.      | 0.17 | -0.25 | 0.75  | 13.5      | 8.7       |

**Table S1.** Summary of transfer parameters of the a-IGZO TFTs with the Al<sub>2</sub>O<sub>3</sub> gate insulators of  $T_{dep}$ = 150°C and 300°C according to the post-annealing temperatures ( $T_{post-ann}$ =200- 400°C) ( $V_{ds}$ =0.1 V)

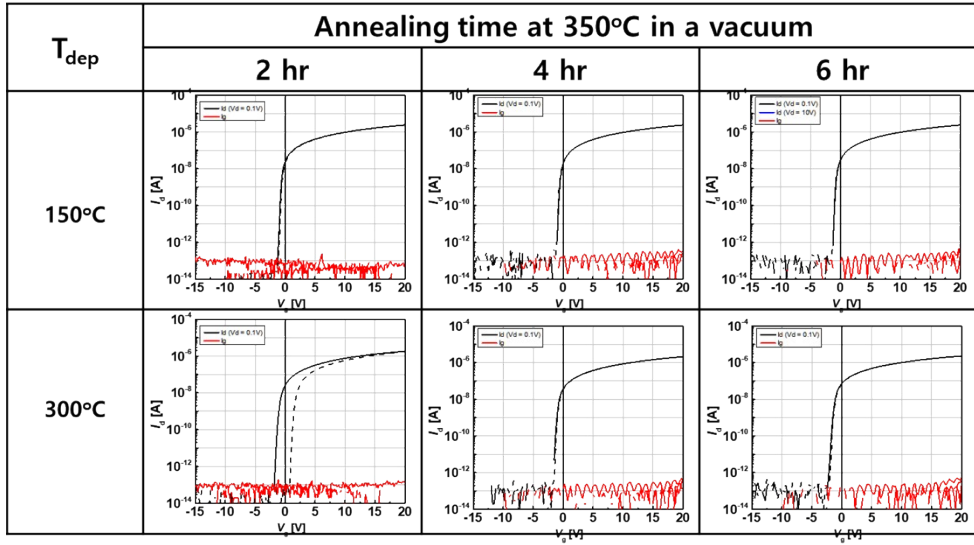

| $T_{dep}$ | Annealing Temp. | Time  | S.S   | Von   | Hys. | U_lin | U_sat |
|-----------|-----------------|-------|-------|-------|------|-------|-------|
| 150°C     | 350°C           | 2hr   | 0.13  | -1    | 0.14 | 18.7  | 12    |
|           |                 | 4hr   | 0.13  | -1    | 0    | 18.8  | 11.9  |
|           |                 | 6hr   | 0.127 | -1.25 | 0    | 18.84 | 12.0  |
| 2hr       |                 | 0.16  | -1.56 | 2.52  | 14   | 10.1  |       |
| 4hr       |                 | 0.176 | -1.5  | 0.25  | 16.2 | 10.3  |       |
| 6hr       |                 | 0.18  | -2    | 0.25  | 16.9 | 10.8  |       |

**Fig.S3.** Individual transfer curves and summary of parameters of the a-IGZO TFTs with the  $Al_2O_3$  gate insulators of  $T_{dep} = 150^\circ C$  (HH-) and  $300^\circ C$  (LH-) according to the post-annealing times (2hr – 6hr). The post-annealing temperature was fixed at  $350^\circ C$ .

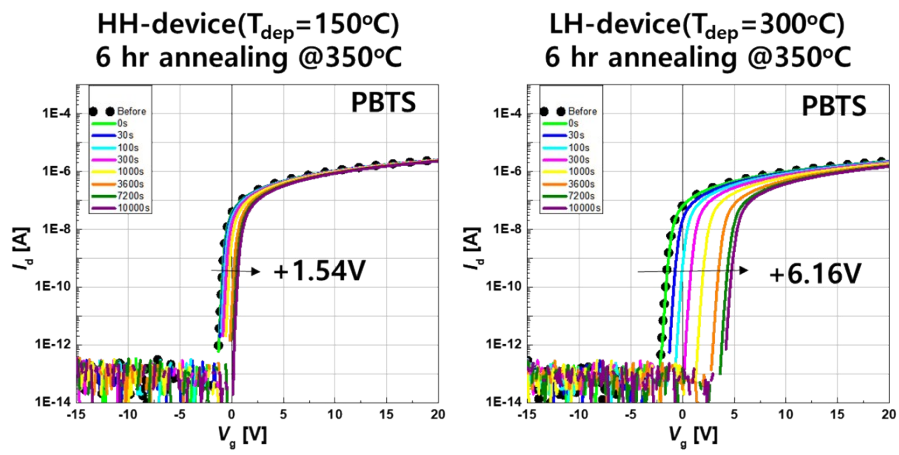

**Fig.S4.** PBTS stability results of the a-IGZO TFTs with the  $\text{Al}_2\text{O}_3$  gate insulators of  $T_{\text{dep}}=150^{\circ}\text{C}$  (HH-) and  $300^{\circ}\text{C}$  (LH-) after post-annealing for 6 hr at  $350^{\circ}\text{C}$ .

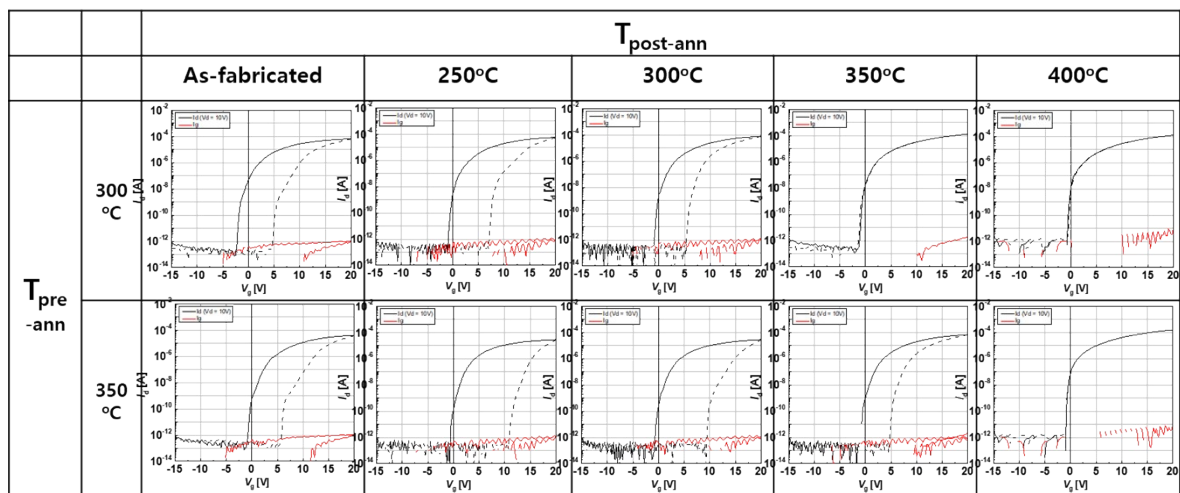

**Fig. S5** Individual transfer curves of the a-IGZO TFTs with the  $\text{Al}_2\text{O}_3$  gate insulators of  $T_{\text{dep}} = 150^\circ\text{C}$  according to different pre-annealing temperatures (300 and 350 °C) of  $\text{Al}_2\text{O}_3$  layer

| Pre-annealing. | Annealing Temp. | S.S  | Von   | Hys. | Sat_u |
|----------------|-----------------|------|-------|------|-------|
| <b>300 °C</b>  | As              | 0.21 | -1    | 6.5  | 5.2   |
|                | 250°C Vac.      | 0.22 | -0.75 | 8    | 5.1   |
|                | 300°C Vac.      | 0.21 | -0.75 | 5.5  | 6.2   |
|                | 350°C Vac.      | 0.14 | -1    | 0    | 7.2   |
|                | 400°C Vac.      | 0.13 | -1    | 0.25 | 10.6  |
| <b>350 °C</b>  | As              | 0.25 | -0.5  | 6.5  | 3.95  |
|                | 250°C Vac.      | 0.27 | -0.75 | 10   | 2.9   |
|                | 300°C Vac.      | 0.26 | -0.5  | 10   | 2.64  |
|                | 350°C Vac.      | 0.22 | -0.75 | 5.5  | 6.25  |
|                | 400°C Vac.      | 0.12 | -1.25 | 0.25 | 10.3  |

**Table S2.** Summary of transfer parameters of the a-IGZO TFTs with the Al<sub>2</sub>O<sub>3</sub> gate insulators of T<sub>dep</sub>= 150°C according to different pre-annealing temperatures (300 and 350 °C) of Al<sub>2</sub>O<sub>3</sub> layer



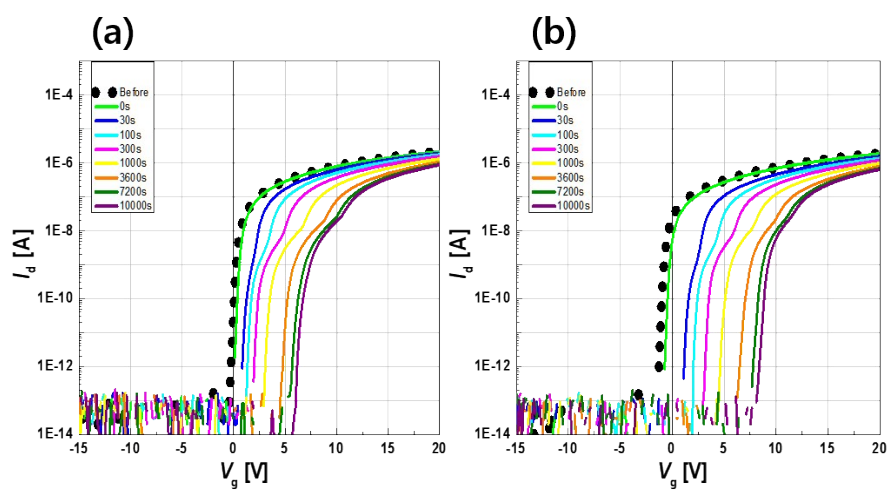

**Fig. S6** Evolution of the transfer curve of a-IGZO TFTs with  $\text{Al}_2\text{O}_3$  gate insulator of  $T_{\text{dep}}=150^\circ\text{C}$  under PBTS condition. (a)  $T_{\text{pre-ann}}=300^\circ\text{C}$ , and (b)  $T_{\text{pre-ann}}=350^\circ\text{C}$  of  $\text{Al}_2\text{O}_3$  layer. The  $T_{\text{post-ann}}$  is  $400^\circ\text{C}$ .
